# Supplementary material for: Acylperoxy radicals during ozonolysis of α-pinene: composition, formation mechanism, and contribution to the production of highly oxygenated organic molecules
Source: Copernicus journal article supplement (doi:10.5194/egusphere-2023-838), 2023-05-15
Supplement: Supplementary file 1 [file egusphere-2023-838-supplement.pdf]

*Supplement of*

**Acylperoxy radicals during ozonolysis of  $\alpha$ -pinene: composition, formation mechanism, and contribution to the production of highly oxygenated organic molecules**

Han Zang<sup>1</sup>, Dandan Huang<sup>2</sup>, Jiali Zhong<sup>3</sup>, Chenxi Li<sup>1</sup>, Ziyue Li<sup>1</sup>, Huayun Xiao<sup>1</sup>, Yue Zhao<sup>1,\*</sup>

<sup>1</sup>School of Environmental Science and Engineering, Shanghai Jiao Tong University, Shanghai, 200240, China

<sup>2</sup>Shanghai Academy of Environmental Sciences, Shanghai 200233, China

<sup>3</sup>Division of Environment and Sustainability, Hong Kong University of Science and Technology, Hong Kong SAR, 999077, China

\*Correspondence: Yue Zhao (yuezhao20@sjtu.edu.cn)

*This file contains*

*14 pages*

*4 tables*

*13 figures*

### **S1 Changes in measured RO<sub>2</sub> and closed-shell products as a function of the reacted $\alpha$ -pinene.**

The changes of selected RO<sub>2</sub> and the corresponding closed-shell monomers and dimers as a function of the reacted  $\alpha$ -pinene are consistent with previous studies (Figure S7) (Zhao et al., 2018). The RO<sub>2</sub> concentration increases rapidly when the reacted  $\alpha$ -pinene is relatively low, and the increasing rate slows down due to the elevated removal rate of RO<sub>2</sub> via cross-reactions at higher reacted  $\alpha$ -pinene (> 20 ppb). The dimers exhibit opposite trends with RO<sub>2</sub>. As the reacted  $\alpha$ -pinene increases, the increasing rates of the dimers become slightly higher due to the promoted RO<sub>2</sub> cross-reactions. As for the HOM monomers, their concentrations basically show linear correlations with increasing reacted  $\alpha$ -pinene.

Table S1 Summary of experimental conditions of  $\alpha$ -pinene ozonolysis with the addition of NO<sub>2</sub>.

| Exp # | $\alpha$ -pinene conc | O <sub>3</sub> conc | NO <sub>2</sub> conc | Reacted $\alpha$ -pinene |
|-------|-----------------------|---------------------|----------------------|--------------------------|
| 1     | 500                   | 45                  | 0                    | 2.4                      |
| 2     | 500                   | 45                  | 3                    | 2.4                      |
| 3     | 500                   | 45                  | 7                    | 2.4                      |
| 4     | 500                   | 45                  | 10                   | 2.4                      |
| 5     | 500                   | 45                  | 15                   | 2.4                      |
| 6     | 500                   | 45                  | 20                   | 2.4                      |
| 7     | 500                   | 45                  | 30                   | 2.4                      |
| 8     | 1000                  | 45                  | 0                    | 4.8                      |
| 9     | 1000                  | 45                  | 3                    | 4.8                      |
| 10    | 1000                  | 45                  | 7                    | 4.8                      |
| 11    | 1000                  | 45                  | 10                   | 4.8                      |
| 12    | 1000                  | 45                  | 15                   | 4.8                      |
| 13    | 1000                  | 45                  | 20                   | 4.8                      |
| 14    | 1000                  | 45                  | 30                   | 4.8                      |
| 15    | 2000                  | 45                  | 0                    | 9.3                      |
| 16    | 2000                  | 45                  | 3                    | 9.3                      |
| 17    | 2000                  | 45                  | 7                    | 9.3                      |
| 18    | 2000                  | 45                  | 10                   | 9.3                      |
| 19    | 2000                  | 45                  | 15                   | 9.3                      |
| 20    | 2000                  | 45                  | 20                   | 9.3                      |
| 21    | 2000                  | 45                  | 30                   | 9.3                      |
| 22    | 500                   | 180                 | 0                    | 9.6                      |
| 23    | 500                   | 180                 | 3                    | 9.6                      |
| 24    | 500                   | 180                 | 7                    | 9.6                      |
| 25    | 500                   | 180                 | 10                   | 9.6                      |
| 26    | 500                   | 180                 | 15                   | 9.6                      |
| 27    | 500                   | 180                 | 20                   | 9.6                      |
| 28    | 500                   | 180                 | 30                   | 9.6                      |
| 29    | 3000                  | 45                  | 0                    | 13.5                     |
| 30    | 1000                  | 180                 | 0                    | 18.9                     |
| 31    | 2000                  | 180                 | 0                    | 36.8                     |
| 32*   | 2000                  | 45                  | 0                    | 5.0                      |

\* 500 ppm cyclohexane was added as an OH scavenger in this experiment.

Table S2 Summary of experimental conditions of  $\alpha$ -pinene ozonolysis with the addition of NO.

| Exp # | $\alpha$ -pinene conc | O <sub>3</sub> conc | NO conc | Reacted $\alpha$ -pinene |
|-------|-----------------------|---------------------|---------|--------------------------|
| 33    | 500                   | 45                  | 3       | 2.8                      |
| 34    | 500                   | 45                  | 7       | 3.6                      |
| 35    | 500                   | 45                  | 10      | 4.2                      |
| 36    | 500                   | 45                  | 15      | 4.8                      |
| 37    | 500                   | 45                  | 20      | 5.1                      |
| 38    | 500                   | 45                  | 30      | 5.3                      |
| 39    | 1000                  | 45                  | 3       | 5.2                      |
| 40    | 1000                  | 45                  | 7       | 6.0                      |
| 41    | 1000                  | 45                  | 10      | 6.7                      |
| 42    | 1000                  | 45                  | 15      | 7.8                      |
| 43    | 1000                  | 45                  | 20      | 8.6                      |
| 44    | 1000                  | 45                  | 30      | 9.6                      |
| 45    | 2000                  | 45                  | 3       | 9.6                      |
| 46    | 2000                  | 45                  | 7       | 10.4                     |
| 47    | 2000                  | 45                  | 10      | 11.1                     |
| 48    | 2000                  | 45                  | 15      | 12.3                     |
| 49    | 2000                  | 45                  | 20      | 13.4                     |
| 50    | 2000                  | 45                  | 30      | 15.5                     |
| 51    | 500                   | 180                 | 3       | 9.8                      |
| 52    | 500                   | 180                 | 7       | 10.4                     |
| 53    | 500                   | 180                 | 10      | 10.8                     |
| 54    | 500                   | 180                 | 15      | 11.5                     |
| 55    | 500                   | 180                 | 20      | 12.2                     |
| 56    | 500                   | 180                 | 30      | 13.3                     |

Table S3 Major modifications in MCM mechanisms.

| #  | Reactions                                    | k (s <sup>-1</sup> or cm <sup>3</sup> molecule <sup>-1</sup> s <sup>-1</sup> ) |
|----|----------------------------------------------|--------------------------------------------------------------------------------|
| 1  | APINENE + O3 = 0.5 × APINOOA + 0.5 × APINOOB | 8.05E-16.*exp(-640./T)                                                         |
| 2  | APINOOA = Z-APINAOO                          | KDEC*0.09                                                                      |
| 3  | APINOOA = E-APINAOO                          | KDEC*0.09                                                                      |
| 4  | APINOOA = C107O2 + OH                        | KDEC*0.45                                                                      |
| 5  | APINOOA = C109O2 + OH                        | KDEC*0.37                                                                      |
| 6  | APINOOB = Z-APINBOO                          | KDEC*0.10                                                                      |
| 7  | APINOOB = E-APINBOO                          | KDEC*0.10                                                                      |
| 8  | APINOOB = PINONIC                            | KDEC*0.16                                                                      |
| 9  | APINOOB = C10H15O4KBRO2 + OH                 | KDEC*0.49                                                                      |
| 10 | APINOOB = C10H15O4RBRO2 + OH                 | KDEC*0.5*0.3                                                                   |
| 11 | C107O2 = C10H15O6R1RO2                       | 0.14                                                                           |
| 12 | C109O2 = C10H15O6R1RO2                       | 0.02                                                                           |
| 13 | C10H15O4KBRO2 = C10H15O6KBRO2                | 0.29                                                                           |
| 14 | C10H15O4RBRO2 = C10H15O6RBRO2                | 1                                                                              |
| 15 | RO2 + NO2 = ROONO2                           | 7.5E-12                                                                        |
| 16 | ROONO2 = RO2 + NO2                           | 5                                                                              |

Table S4 Wall loss fractions of OH, HO<sub>2</sub>, and RO<sub>2</sub> radicals, as well as HOM monomers and dimers under different reaction conditions

| Species                          | $D_{gas}$<br>(cm <sup>2</sup><br>s <sup>-1</sup> ) | $k_{wall}$<br>(s <sup>-1</sup> ) | Wall loss fractions (%)                      |                                             |                                             |                                                |
|----------------------------------|----------------------------------------------------|----------------------------------|----------------------------------------------|---------------------------------------------|---------------------------------------------|------------------------------------------------|
|                                  |                                                    |                                  | 500 ppb $\alpha$ p<br>+45 ppb O <sub>3</sub> | 1ppm<br>$\alpha$ p+45 ppb<br>O <sub>3</sub> | 2ppm<br>$\alpha$ p+45 ppb<br>O <sub>3</sub> | 500 ppb<br>$\alpha$ p+45 ppb<br>O <sub>3</sub> |
|                                  |                                                    |                                  | OH                                           | 0.23                                        | 0.0537                                      | 0.14                                           |
| HO <sub>2</sub>                  | 0.15                                               | 0.0354                           | 9.08                                         | 6.71                                        | 4.89                                        | 4.74                                           |
| C <sub>7</sub> -RO <sub>2</sub>  | 0.07                                               | 0.0171                           | 13.9                                         | 11.9                                        | 9.8                                         | 9.6                                            |
| C <sub>8</sub> -RO <sub>2</sub>  | 0.07                                               | 0.0171                           | 25.5                                         | 21.5                                        | 18.0                                        | 17.7                                           |
| C <sub>9</sub> -RO <sub>2</sub>  | 0.07                                               | 0.0171                           | 16.4                                         | 16.2                                        | 14.5                                        | 14.3                                           |
| C <sub>10</sub> -RO <sub>2</sub> | 0.05                                               | 0.0125                           | 11.5                                         | 9.3                                         | 7.4                                         | 7.3                                            |
| C <sub>7</sub> -HOM              | 0.07                                               | 0.0171                           | 24.3                                         | 23.3                                        | 22.5                                        | 22.3                                           |
| C <sub>8</sub> -HOM              | 0.07                                               | 0.0171                           | 34.7                                         | 31.0                                        | 28.1                                        | 27.8                                           |
| C <sub>9</sub> -HOM              | 0.07                                               | 0.0171                           | 29.0                                         | 27.5                                        | 26.1                                        | 25.9                                           |
| C <sub>10</sub> -HOM             | 0.05                                               | 0.0125                           | 22.3                                         | 20.3                                        | 18.6                                        | 18.4                                           |
| C <sub>14-15</sub> -dimers       | 0.05                                               | 0.0125                           | 33.1                                         | 30.5                                        | 27.8                                        | 27.6                                           |
| C <sub>16-19</sub> -dimers       | 0.03                                               | 0.0079                           | 25.4                                         | 22.6                                        | 20.0                                        | 19.7                                           |
| C <sub>20</sub> -dimers          | 0.03                                               | 0.0079                           | 17.5                                         | 15.8                                        | 14.4                                        | 14.2                                           |

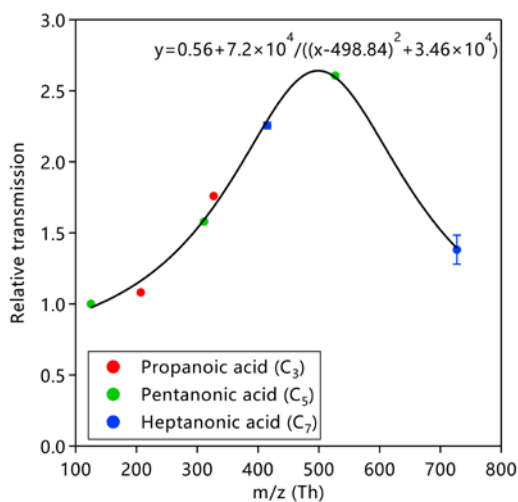

Figure S1 Mass-dependent transmission efficiency of nitrate-CIMS.

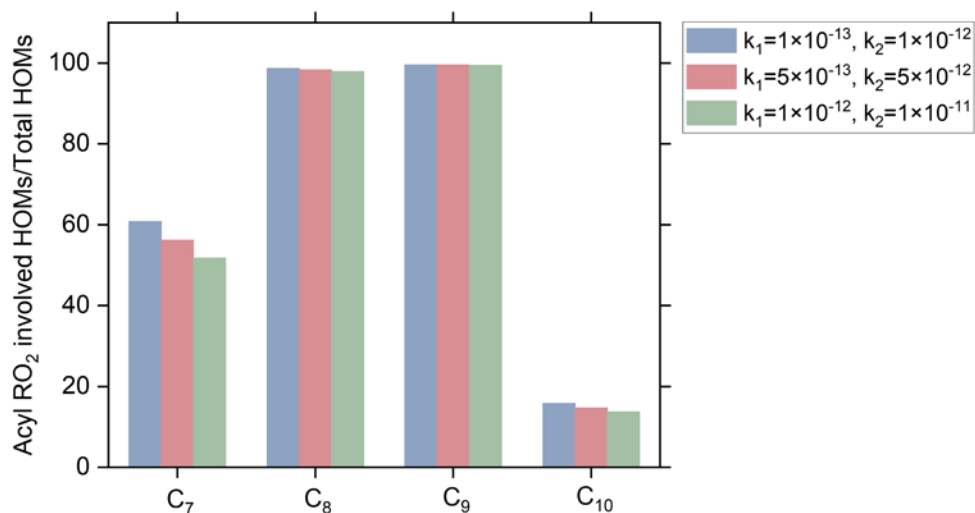

Figure S2 Sensitive analysis of the dimer formation rate to acyl RO<sub>2</sub>-involved HOM formation,  $k_1$  and  $k_2$  are the dimer formation rates for alkyl and acyl RO<sub>2</sub>, respectively, the unit is  $\text{cm}^3 \text{molecule}^{-1} \text{s}^{-1}$ .

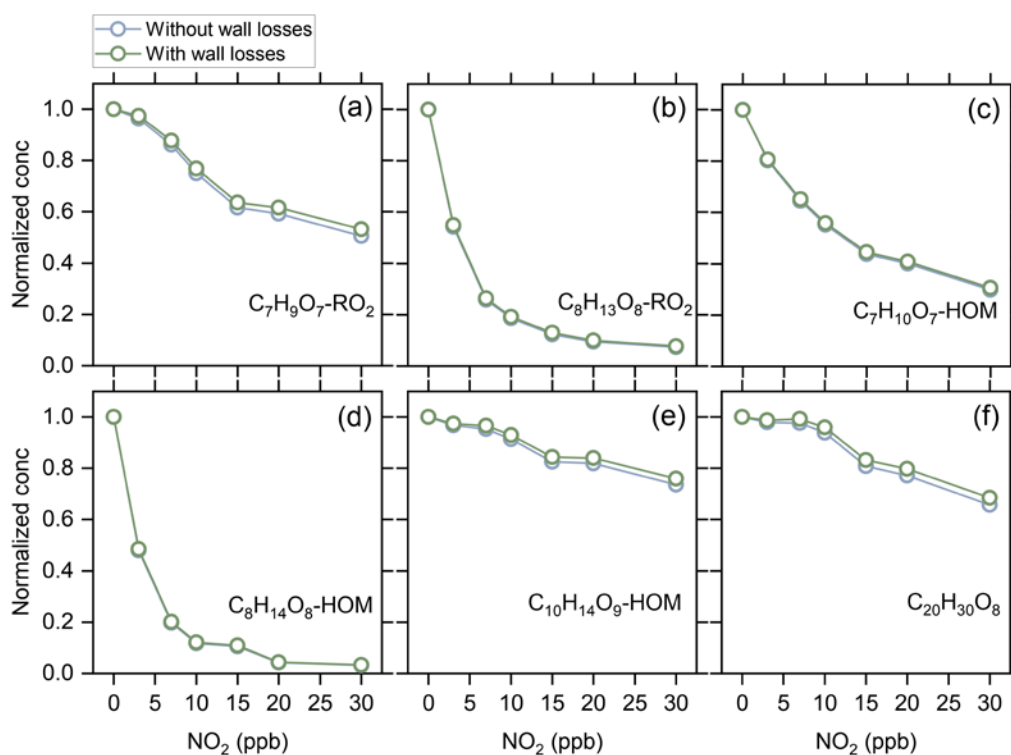

Figure S3 Normalized concentration of typical RO<sub>2</sub>, HOM monomers and dimers as a function of the added NO<sub>2</sub> concentration with/without considering wall losses (Taking Exps 8-14 as an example).

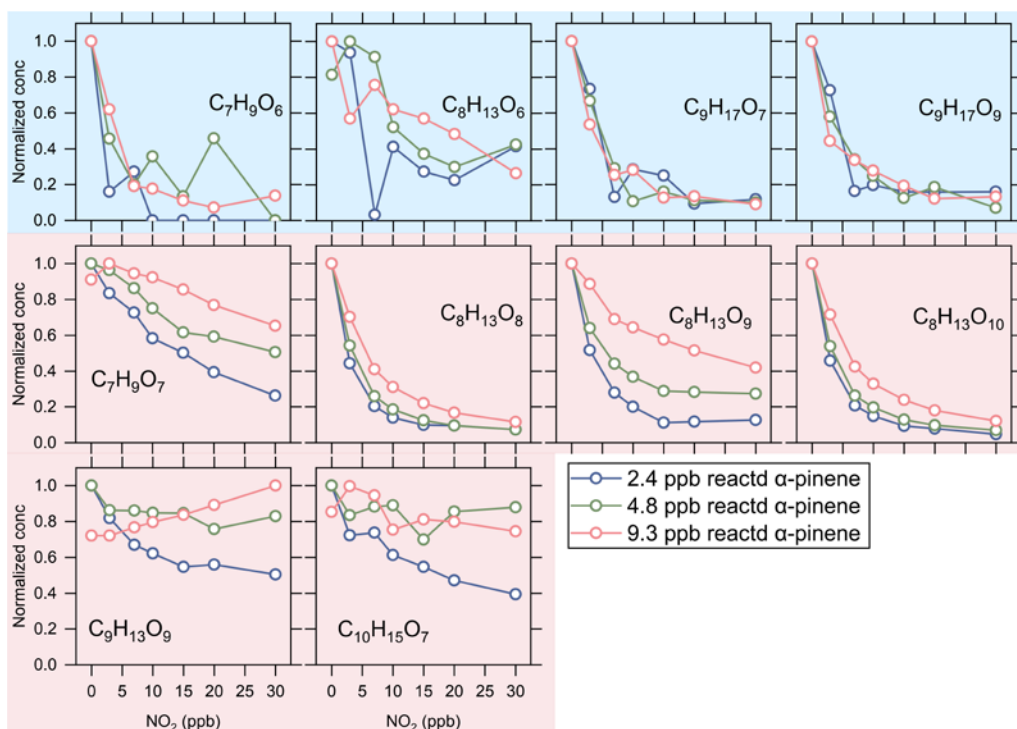

Figure S4 Normalized concentration of the measured acyl RO<sub>2</sub> as a function of the added NO<sub>2</sub> concentration (Exps 1-21). The data are categorized according to the effects of reacted  $\alpha$ -pinene on the decreasing extents of acyl RO<sub>2</sub> concentration, which are indicated by different background colors (blue: no obvious effects, pink: the decreasing extent becomes lower when reacted  $\alpha$ -pinene increases).

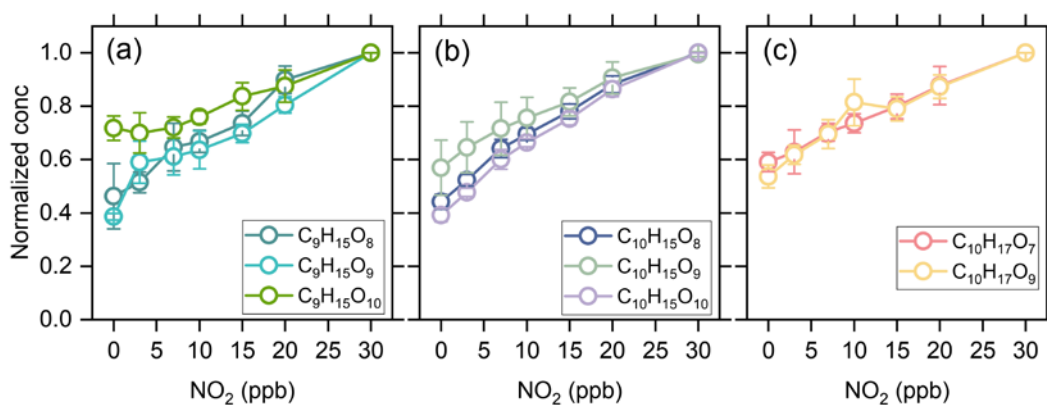

Figure S5 Averaged normalized concentration of the measured alkyl RO<sub>2</sub> as a function of the added NO<sub>2</sub> concentration (Exps 1-28).



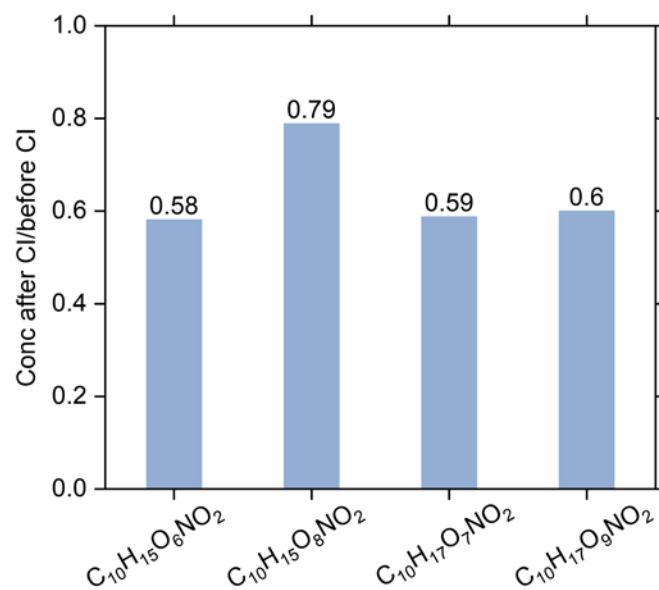

Figure S6 Ratio of simulated concentration of ROONO<sub>2</sub> after leaving the CI inlet to the concentration before into the CI inlet (the experimental conditions are same as Exp 14), the acyl RO<sub>2</sub> C<sub>10</sub>H<sub>15</sub>O<sub>8</sub> reported by Iyer et al. (2021) is included in the model, therefore the decomposition of the whole ROONO<sub>2</sub> is relatively lower.

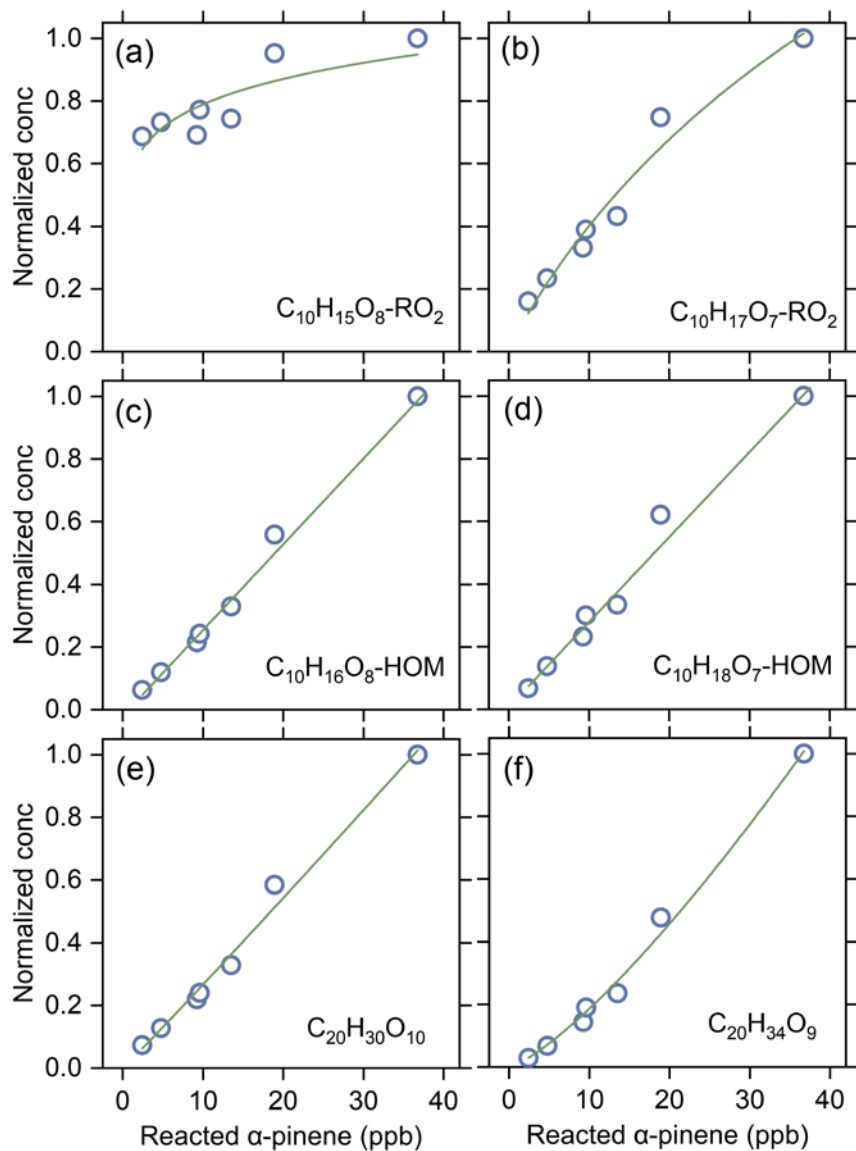

Figure S7 Normalized concentration of selected  $RO_2$  as well as closed-shell monomers and dimers as a function of the reacted  $\alpha$ -pinene (Exps 1, 8, 15, 22, and 29-31).

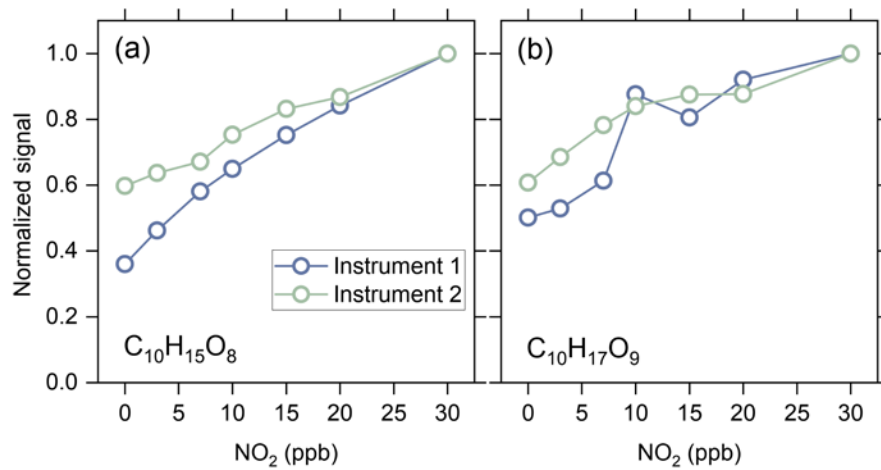

Figure S8 Changes of typical alkyl RO<sub>2</sub> concentration with different NO<sub>2</sub> concentration measured by two nitrate-CIMS under the same experimental conditions (Exps15-21). Instrument 1 is the nitrate-CIMS we used in this study.

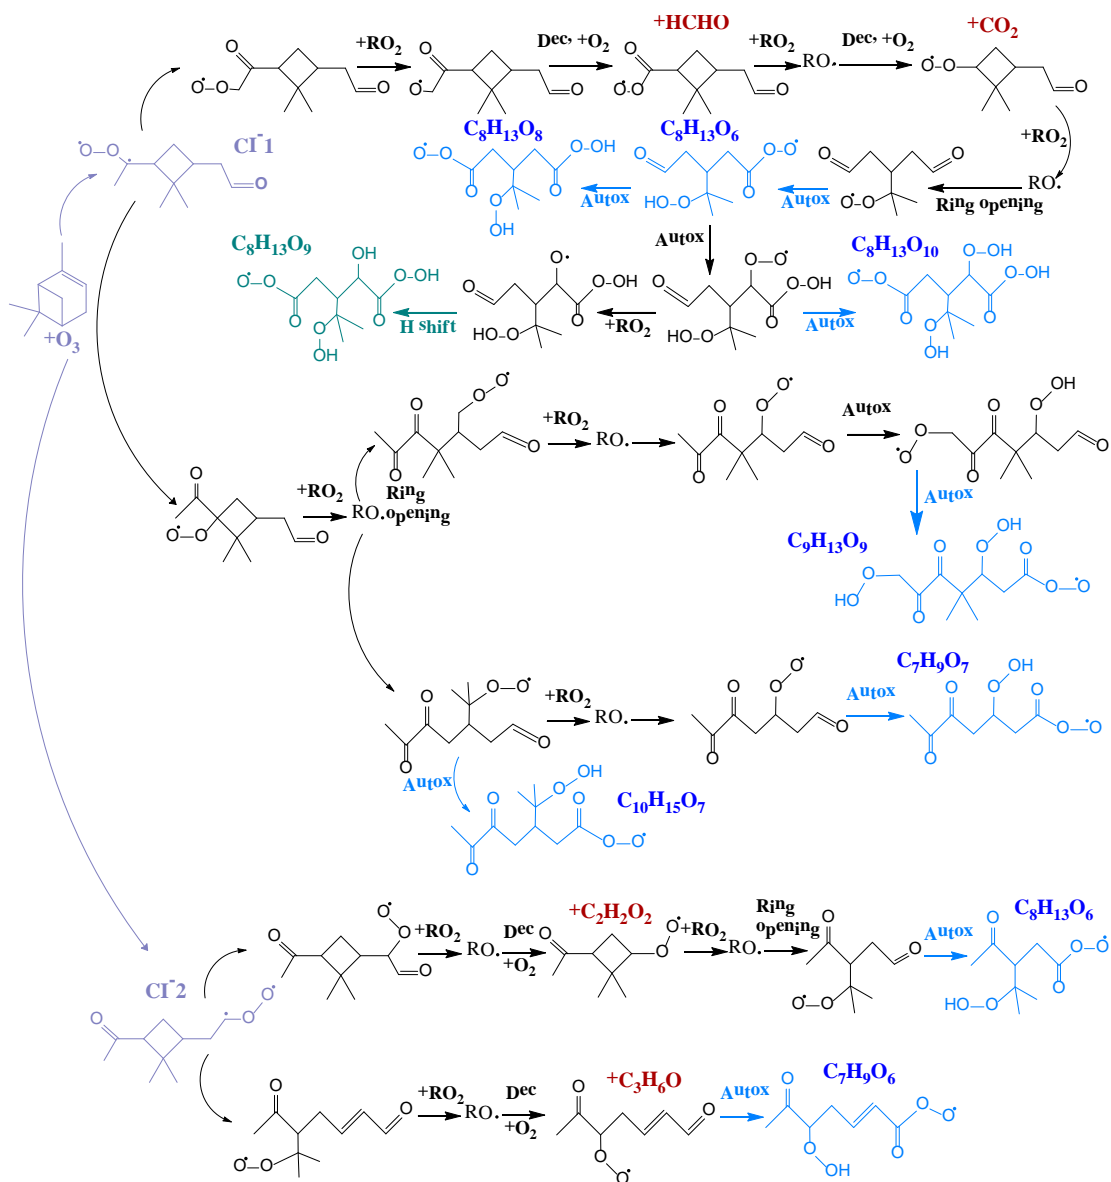

Figure S9 Formation mechanisms of the acyl RO<sub>2</sub> measured in this study.

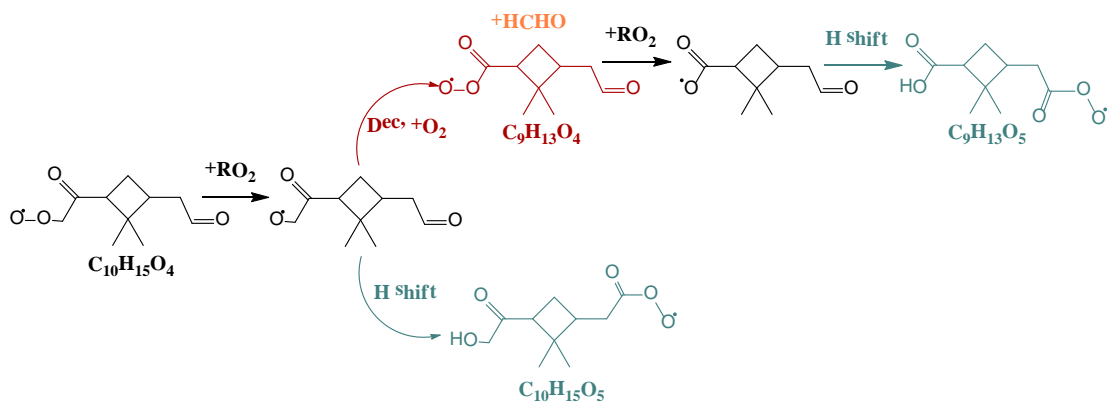

Figure S10 Formation pathways of the acyl RO<sub>2</sub> with oxygen atoms less than 6 in default MCM v3.3.1.

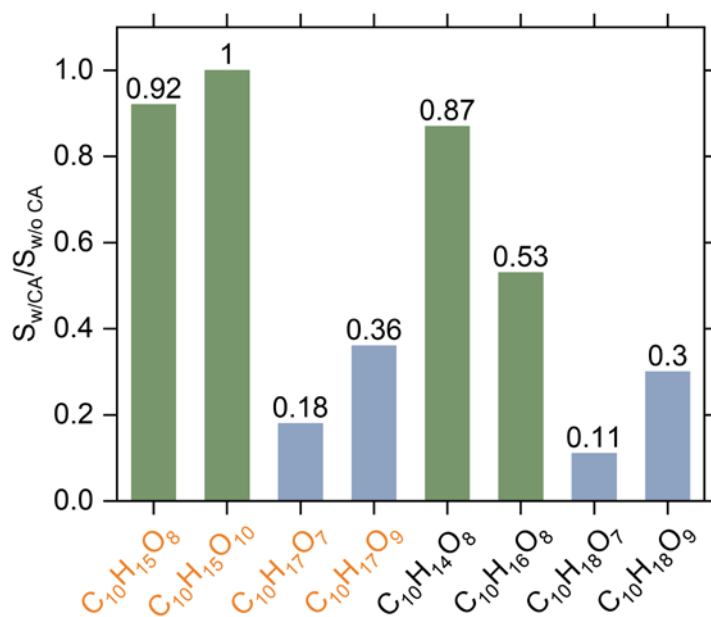

Figure S11 Relative changes in concentration of typical C<sub>10</sub> RO<sub>2</sub> and HOM monomers due to the addition of 500 ppm cyclohexane (Exp 32), the yellow species are RO<sub>2</sub> radicals.

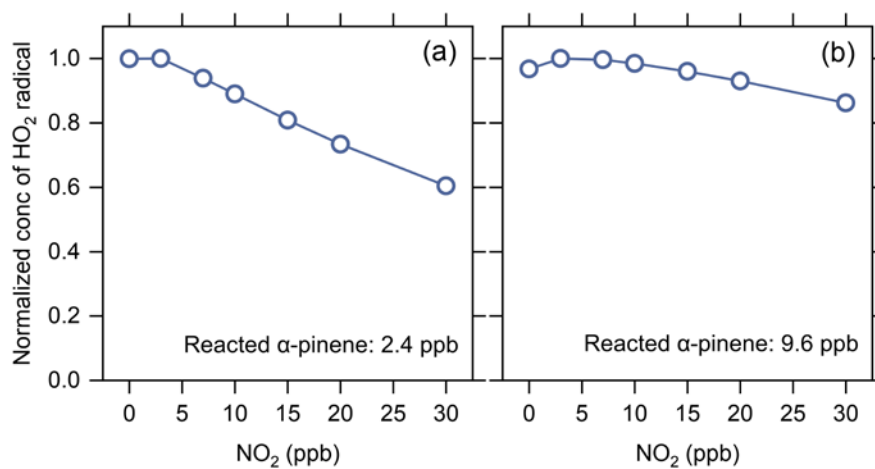

Figure S12 Normalized concentration of the HO<sub>2</sub> radicals as a function of NO<sub>2</sub> concentration under low (2.4 ppb, a) and high (9.6 ppb, b) reacted  $\alpha$ -pinene conditions.

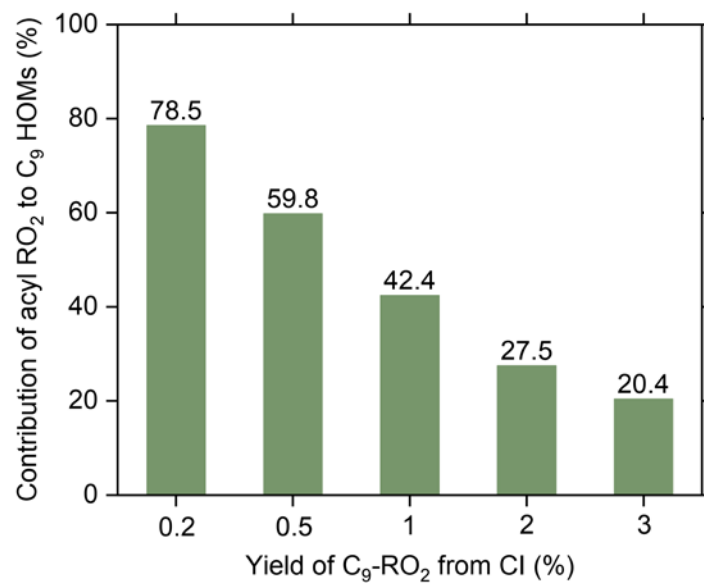

Figure S13 Sensitive analysis of C<sub>9</sub> RO<sub>2</sub> yield from one of the CI to the contribution of C<sub>9</sub> acyl RO<sub>2</sub> related HOMs.

#### References

- Iyer, S., Rissanen, M. P., Valiev, R., Barua, S., Krechmer, J. E., Thornton, J., Ehn, M., and Kurten, T.: Molecular mechanism for rapid autoxidation in alpha-pinene ozonolysis, *Nat. Commun.*, 12, 878, <https://doi.org/10.1038/s41467-021-21172-w>, 2021.
- Zhao, Y., Thornton, J. A., and Pye, H. O. T.: Quantitative constraints on autoxidation and dimer formation from direct probing of monoterpene-derived peroxy radical chemistry, *Proc. Natl. Acad. Sci. U. S. A.*, 115, 12142-12147, <https://doi.org/10.1073/pnas.1812147115>, 2018.
