# Supplementary material for: Acylperoxy radicals during ozonolysis of α-pinene: composition, formation mechanism, and contribution to the production of highly oxygenated organic molecules
Source: Copernicus journal article supplement (doi:10.5194/egusphere-2023-838), 2023-05-15
Supplement: Supplementary file [file egusphere-2023-838-AC2-supplement.pdf]

## Response to Reviewer #2

We are grateful to the reviewer for the thoughtful comments on the manuscript. Our point-to-point responses to each comment are as follows (reviewer's comments are in black font and our responses are in blue font).

### General Comments

In this study, the authors investigated the fraction of acyl peroxy radicals ( $\text{RO}_2$ ) formed from  $\alpha$ -pinene ozonolysis. Acyl- $\text{RO}_2$ s are of crucial atmospheric importance due to their higher reactivity and their role in the formation of aerosol precursors. In flow reactor  $\alpha$ -pinene ozonolysis experiments,  $\text{NO}_2$  was used as an acyl- $\text{RO}_2$  scavenger, and the reduction in  $\text{RO}_2$  signals was used to probe the fraction of acyl- $\text{RO}_2$ s produced. The paper is well written and makes a significant contribution towards the better understanding of a key aerosol forming system in the atmosphere. I recommend the publication of the manuscript in ACP after the authors address my minor comments below:

In addition to dimer formation and producing RO, alkyl- $\text{RO}_2$  cross reactions also lead to  $\text{ROH} + \text{R}=\text{O}$  products, and if the initial peroxy radical group is on a primary carbon atom, the  $\text{R}=\text{O}$  can be a source of acyl- $\text{RO}_2$  following a secondary OH reaction. Alkyl  $\text{RO}_2$ s can have significant yields for this reaction. Was this accounted for in the model and in the analysis of the experiments?

Response: Thanks for the reviewer's comment. During the OH oxidation of  $\alpha$ -pinene, acyl  $\text{RO}_2$  can be formed from the secondary OH oxidation of aldehydes such as pinonaldehyde. However, in the present study, the secondary OH oxidation is significantly inhibited due to an excess of  $\alpha$ -pinene compared to  $\text{O}_3$ , therefore the contribution of secondary OH oxidation to acyl  $\text{RO}_2$  formation is expected to be relatively small. We considered the secondary OH oxidation in the model simulations, and found that the contribution of secondary OH oxidation to acyl  $\text{RO}_2$  formation is negligible even under the high  $\text{O}_3$  condition (Exp 22, 500 ppb  $\alpha$ -pinene + 180 ppb  $\text{O}_3$ ). As shown in Figure S9, the acyl  $\text{RO}_2$   $\text{C}_9\text{H}_{13}\text{O}_4$  ( $\text{C}_89\text{CO}_3$  in Figure S9a) and  $\text{C}_{10}\text{H}_{15}\text{O}_5$  ( $\text{C}_920\text{CO}_3$  in Figure S9b) can be formed from both C-C cleavage/H-shift of  $\text{C}_{10}\text{H}_{15}\text{O}_4\text{-RO}$  (Figure 4) and OH oxidation of the first-generation aldehyde products. However, the contributions from secondary OH oxidation are negligible for the two acyl  $\text{RO}_2$  species during the whole reaction period under the high  $\text{O}_3$  condition (Exp 22, 500 ppb  $\alpha$ -pinene + 180 ppb  $\text{O}_3$ ). In addition, the acyl  $\text{RO}_2$   $\text{C}_{10}\text{H}_{15}\text{O}_4$  ( $\text{C}_96\text{CO}_3$ ) that can be only formed from OH oxidation of pinonaldehyde contributes to only 0.01% and 0.2% of the total  $\text{C}_{10}\text{H}_{15}\text{O}_4\text{-RO}_2$  and total acyl  $\text{RO}_2$  concentration, respectively. Therefore, the contribution of secondary OH oxidation to acyl  $\text{RO}_2$  in this study is minor and the majority of acyl  $\text{RO}_2$  species measured here are formed from the ozonolysis channel.

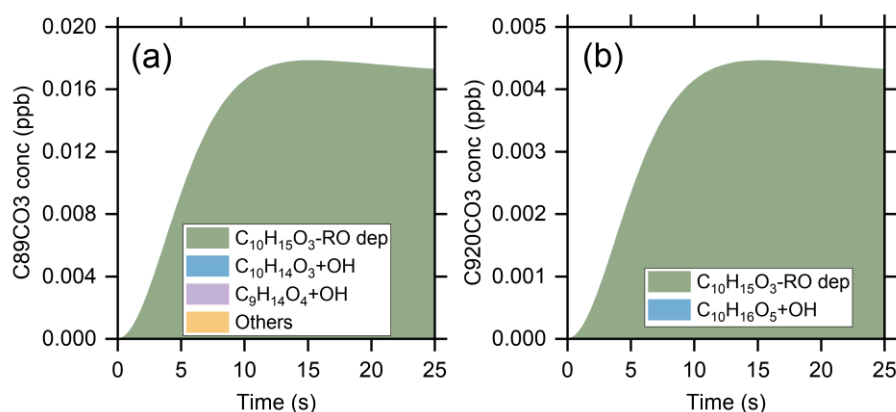

Figure S9 Simulated contribution of different processes to the formation of (a)  $\text{C}_9\text{H}_{13}\text{O}_4$  ( $\text{C}_89\text{CO}_3$ ) and (b)  $\text{C}_{10}\text{H}_{15}\text{O}_5$  ( $\text{C}_920\text{CO}_3$ ) acyl- $\text{RO}_2$  during ozonolysis of  $\alpha$ -pinene (Exp 22, 500 ppb  $\alpha$ -pinene + 180 ppb  $\text{O}_3$ ).

We have added the following discussions to Section 3.2 of the main text.

“In addition, the secondary OH oxidation of aldehyde products can also produce acyl  $\text{RO}_2$  radicals during ozonolysis of  $\alpha$ -pinene. However, in the present study, the secondary OH oxidation is expected to be

insignificant due to an excess of  $\alpha$ -pinene compared to  $O_3$ . Indeed, kinetic model simulations incorporating the secondary OH chemistry show that the contribution of secondary OH oxidation to acyl  $RO_2$  formation is negligible even under high  $O_3$  conditions (see details in Section S2 and Figure S9)”

We have also added the following content and Figure S10 to the SI.

“S2. Contribution of secondary OH oxidation to acyl  $RO_2$  formation.

Considering that the secondary OH oxidation of aldehyde products can also contribute to the formation of acyl  $RO_2$  during ozonolysis of  $\alpha$ -pinene, kinetic model simulations incorporating secondary OH chemistry were also performed under typical experimental conditions. As shown in Figure S9, the acyl  $RO_2$   $C_9H_{13}O_4$  (C89CO3 in Figure S9a,) and  $C_{10}H_{15}O_5$  (C920CO3 in Figure S9b) can be formed from both C-C cleavage/H-shift of  $C_{10}H_{15}O_4$ -RO (Figure 4) and OH oxidation of the first-generation aldehyde products. However, the contributions from secondary OH oxidation are negligible for the two acyl  $RO_2$  species during the whole reaction period. In addition, the acyl  $RO_2$   $C_{10}H_{15}O_4$  (C96CO3) that can be only formed from OH oxidation of pinonaldehyde contributes to only 0.01% and 0.2% of the total  $C_{10}H_{15}O_4$ - $RO_2$  and total acyl  $RO_2$  concentration, respectively (not shown). Therefore, the contribution of secondary OH oxidation to acyl  $RO_2$  in this study is minor and the majority of acyl  $RO_2$  species measured here are formed from the ozonolysis channel.”

The more functionalized acyl- $RO_2$ s with an -OOH group elsewhere in the molecule are known to undergo H-scrambling reactions to form peroxy acids (R-C(O)OOH) at rates of  $1E3 - 1E5$  s $^{-1}$  (Knap et al. 2017, J. Phys. Chem. A, 121(7), pp.1470-1479). Can the authors comment on the possible role of this reaction in their experiments? For example, the ring-opened acyl  $C_{10}H_{15}O_8$ - $RO_2$  that they report has a 1,6 H-scramble available that leads to a peroxy acid and an alkyl  $RO_2$ . For their model system, Knap et al. estimate a rate coefficient for the 1,6 H-shift of  $1.5E5$  s $^{-1}$ . If the rate coefficient is comparable for the alpha-pinene derived  $C_{10}H_{15}O_8$  acyl- $RO_2$  above, this could to an extent explain the low reduction in signal upon  $NO_2$  addition.

Response: We appreciate the reviewer’s point. We have performed a model simulation to evaluate the influence of H-scrambling reactions on the response of ring-opened acyl  $C_{10}H_{15}O_8$ - $RO_2$  to  $NO_2$  addition. As shown in Figure S14, when a 1,6 H-shift rate of  $1 \times 10^5$  s $^{-1}$  is considered, the extent of the reduction in  $C_{10}H_{15}O_8$ - $RO_2$  with  $NO_2$  addition indeed becomes smaller, especially when the yield of ring-opened  $C_{10}H_{15}O_4$ - $RO_2$  in the model is at a higher limit (89%). Therefore, the H-scrambling reactions of the ring-opened acyl  $C_{10}H_{15}O_8$ - $RO_2$  could to certain extent explain the low reduction in its signal upon  $NO_2$  addition.

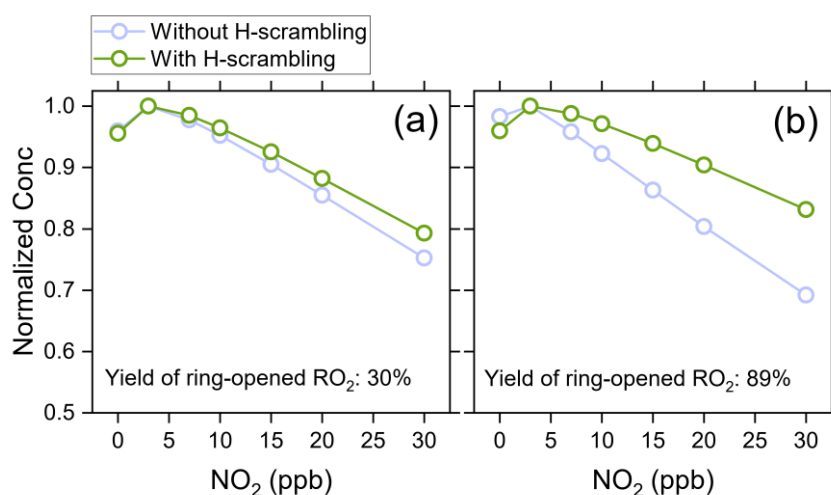

Figure S14 Simulated influence of H-scrambling reaction on the behavior of the ring-opened acyl  $C_{10}H_{15}O_8$ - $RO_2$  as a function of added  $NO_2$  concentration (Exps 8-14). A 1,6 H-scrambling rate of  $1 \times 10^5$  s $^{-1}$  and an alkyl  $RO_2$ + $NO_2$  rate coefficient of  $5 \times 10^{-12}$  cm $^3$  molecule $^{-1}$  s $^{-1}$  were used in the model.

We have added the following discussions to Section 3.3 in the main text.

“Thirdly, the ring-opened  $C_{10}H_{15}O_8$ - $RO_2$ , a highly functionalized acyl  $RO_2$  radical with an -OOH group, may be able to undergo very fast intramolecular H-scrambling reactions to form a peroxy acid as

suggested by Knap and Jørgensen (2017), which would compete with the NO<sub>2</sub> reaction and result in a lower reduction in its signal upon NO<sub>2</sub> addition (see details in Section S3)”

We have also added the following content and Figure S14 to the SI.

“S3 Possible influence of H-scrambling reactions on the behavior of C<sub>10</sub>H<sub>15</sub>O<sub>8</sub> acyl-RO<sub>2</sub>

It has been suggested that the functionalized acyl RO<sub>2</sub> radicals with an -OOH group could undergo H-scrambling reactions to form peroxy acids at rates of 1×10<sup>3</sup>-1×10<sup>5</sup> s<sup>-1</sup> (Knap and Jørgensen, 2017). Here, we performed a model simulation to evaluate the influence of this reaction on the response of the ring-opened acyl C<sub>10</sub>H<sub>15</sub>O<sub>8</sub>-RO<sub>2</sub> to NO<sub>2</sub> addition. As shown in Figure S14, considering a 1,6 H-shift rate of 1×10<sup>5</sup> s<sup>-1</sup>, the simulated reduction in total C<sub>10</sub>H<sub>15</sub>O<sub>8</sub>-RO<sub>2</sub> concentration with the addition of 30 ppb NO<sub>2</sub> decreases from 25% to 21% for a C<sub>10</sub>H<sub>15</sub>O<sub>4</sub>-RO<sub>2</sub> yield of 30% (lower limit) and from 31% to 17% for a yield of 89% (higher limit). These results suggest that the H-scrambling reactions of the ring-opened acyl C<sub>10</sub>H<sub>15</sub>O<sub>8</sub>-RO<sub>2</sub> could to certain extent explain the low reduction in its signal upon NO<sub>2</sub> addition.”

Line 468: Regarding the speculation of the formation of alkyl C<sub>9</sub>H<sub>15</sub>O<sub>3</sub>-RO<sub>2</sub> to explain the discrepancy between experiments and simulations, this would compete with the formation of the ring-opened and ring-retaining C<sub>10</sub>H<sub>15</sub>O<sub>4</sub>-RO<sub>2</sub>. How did the sensitivity analysis of including the C<sub>9</sub>H<sub>15</sub>O<sub>3</sub>-RO<sub>2</sub> in the model affect the yield of the C<sub>10</sub>H<sub>15</sub>O<sub>4</sub>-RO<sub>2</sub>s and the subsequent acyl-RO<sub>2</sub>s derived from them?

Response: We have evaluated the influence of the sensitivity analysis of C<sub>9</sub>H<sub>15</sub>O<sub>3</sub>-RO<sub>2</sub> yield on other C<sub>10</sub>H<sub>15</sub>O<sub>4</sub>-RO<sub>2</sub> as well as on the contribution of acyl RO<sub>2</sub> to total C<sub>7-10</sub> HOMs. As shown in Figure S16, as the C<sub>9</sub>H<sub>15</sub>O<sub>3</sub>-RO<sub>2</sub> yield increases from 0% to 3%, the simulated concentration of a ring-retaining C<sub>10</sub>H<sub>15</sub>O<sub>4</sub>-RO<sub>2</sub> radical (C10H15O4KB) decreases by only ~5% and other C<sub>10</sub>H<sub>15</sub>O<sub>4</sub>-RO<sub>2</sub> species are basically unchanged. As the C<sub>9</sub>H<sub>15</sub>O<sub>3</sub>-RO<sub>2</sub> is considered to only produce highly oxygenated alkyl RO<sub>2</sub> in the model, the increase in its yield results in a decrease in the contribution of acyl RO<sub>2</sub> to the total C<sub>9</sub> HOMs. However, the contributions of acyl RO<sub>2</sub> to total C<sub>7</sub>, C<sub>8</sub>, and C<sub>10</sub> HOMs are almost unchanged.

We have added the above results and discussion to Section 3.3 in the main text and Figure S16 to the SI.

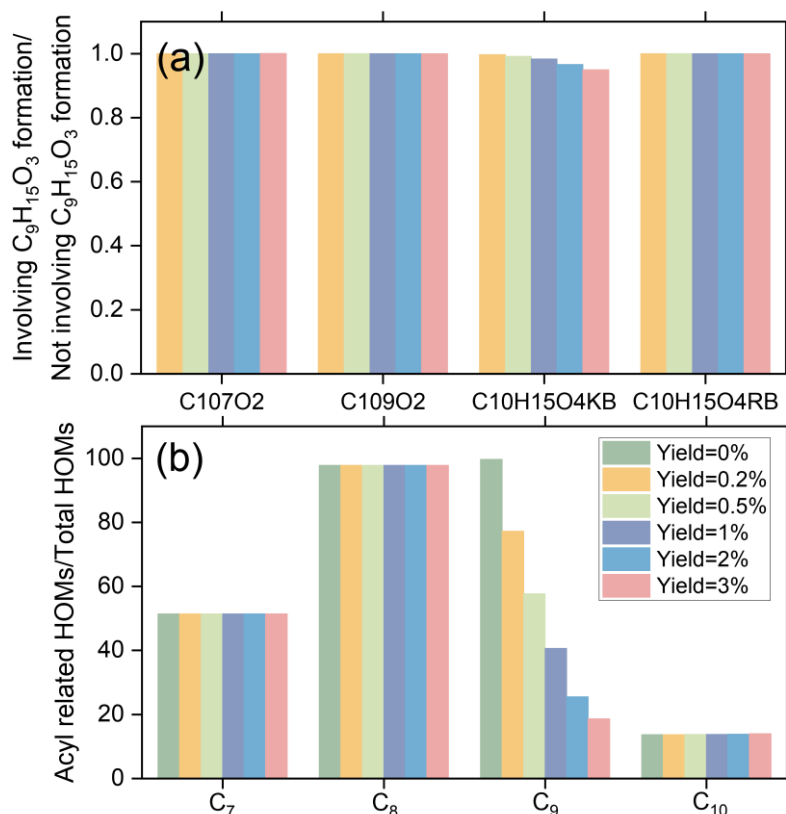

Figure S16 Influences of C<sub>9</sub>H<sub>15</sub>O<sub>3</sub>-RO<sub>2</sub> production on (a) the yield of C<sub>10</sub>H<sub>15</sub>O<sub>4</sub>-RO<sub>2</sub> and (b) the

contribution of acyl RO<sub>2</sub> to total C<sub>7-10</sub> HOMs (Taking Exp 8 as an example). The C<sub>10</sub>H<sub>15</sub>O<sub>4</sub>KB and C<sub>10</sub>H<sub>15</sub>O<sub>4</sub>RB denote a ring-retaining and a ring-opened C<sub>10</sub>H<sub>15</sub>O<sub>4</sub>-RO<sub>2</sub>, respectively (see Table S3 and the main text).

Are any of the acyl peroxy nitrates detected by the NO<sub>3</sub>-CIMS? Alpha-pinene derived APNs with 8 oxygen atoms or more should have at least 2 -OOH functional groups and will presumably cluster well with NO<sub>3</sub>. Do the decrease in e.g. C<sub>7</sub> and C<sub>8</sub> RO<sub>2</sub> signals when NO<sub>2</sub> is added show an increase in the corresponding APN signals? I think a spectrum figure maybe in the supplementary showing the acyl-RO<sub>2</sub> and acyl-ROONO<sub>2</sub> peaks would be useful.

Response: We have added a spectrum figure in SI showing the signal changes of acyl RO<sub>2</sub> and their corresponding RC(O)OONO<sub>2</sub> (Figure S3). It can be seen that the signals of acyl RO<sub>2</sub> decrease remarkably with the addition of NO<sub>2</sub>. Accordingly, the signals of highly oxygenated RC(O)OONO<sub>2</sub> such as C<sub>9</sub>H<sub>13</sub>O<sub>9</sub>NO<sub>2</sub>, C<sub>9</sub>H<sub>17</sub>O<sub>7</sub>NO<sub>2</sub>, and C<sub>10</sub>H<sub>15</sub>O<sub>7</sub>NO<sub>2</sub> increase significantly. We note that some of RC(O)OONO<sub>2</sub> have very similar m/z values with some alkyl RO<sub>2</sub>. For example, the m/z values of C<sub>8</sub>H<sub>13</sub>O<sub>6</sub>NO<sub>2</sub> (251.0641) and C<sub>8</sub>H<sub>13</sub>O<sub>8</sub>NO<sub>2</sub> (283.0539) are very close to those of C<sub>9</sub>H<sub>15</sub>O<sub>8</sub>-RO<sub>2</sub> (251.0767) and C<sub>9</sub>H<sub>15</sub>O<sub>10</sub>-RO<sub>2</sub> (283.0665), respectively, which always have high ion signals. As a result, although some RC(O)OONO<sub>2</sub> are expected to be formed with NO<sub>2</sub> addition, they could not be unambiguously detected by nitrate-CIMS due to their overlapping with strong alkyl RO<sub>2</sub> peaks in this study.

We have added the following discussions to Section 3.1 in the main text.

“Along with the marked reduction in acyl RO<sub>2</sub> signals, the production of highly oxygenated RC(O)OONO<sub>2</sub> species such as C<sub>9</sub>H<sub>13</sub>O<sub>9</sub>NO<sub>2</sub>, C<sub>9</sub>H<sub>17</sub>O<sub>7</sub>NO<sub>2</sub>, and C<sub>10</sub>H<sub>15</sub>O<sub>7</sub>NO<sub>2</sub> with the addition of NO<sub>2</sub> were observed (see the spectra in Figure S3). However, we note that although some RC(O)OONO<sub>2</sub> such as C<sub>8</sub>H<sub>13</sub>O<sub>6</sub>NO<sub>2</sub> and C<sub>8</sub>H<sub>13</sub>O<sub>8</sub>NO<sub>2</sub> are expected to be formed with NO<sub>2</sub> addition, they could not be unambiguously detected by nitrate-CIMS due to the overlapping of their peaks with strong alkyl RO<sub>2</sub> peaks (C<sub>9</sub>H<sub>15</sub>O<sub>8</sub>-RO<sub>2</sub> and C<sub>9</sub>H<sub>15</sub>O<sub>10</sub>-RO<sub>2</sub>) in this study.”

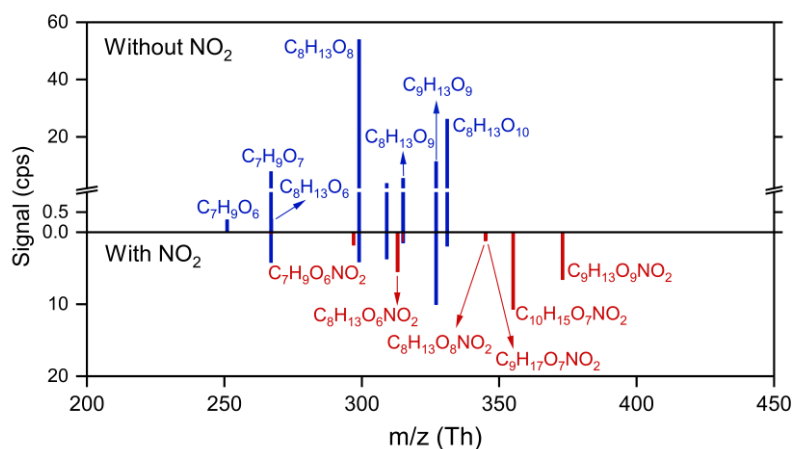

Figure S3 Signals of measured acyl RO<sub>2</sub> and the related RC(O)OONO<sub>2</sub> with and without the addition of NO<sub>2</sub> (Exps 8 and 14).

Figure 4. In pathway 3, the final H-shift of the acyl-oxy is unlikely to compete with CO<sub>2</sub> See reaction r12 and description therein in Vereecken et al. 2009, Phys. Chem. Chem. Phys. 11(40), pp.9062-9074.

Response: Thanks for the reviewer's comment. We have updated pathway 3 with a C<sub>10</sub>H<sub>15</sub>O<sub>3</sub> alkoxy radical that can undergo H-shift to form an acyl RO<sub>2</sub>.

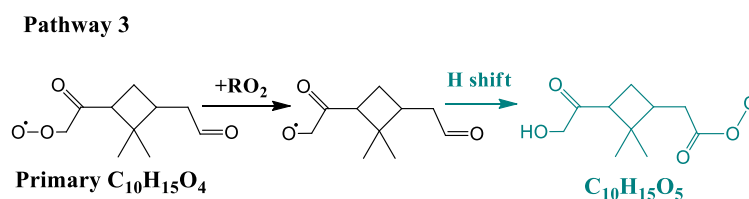

References:

Knap, H. C. and Jørgensen, S.: Rapid Hydrogen Shift Reactions in Acyl Peroxy Radicals, *J. Phys. Chem. A*, 121, 1470-1479, 10.1021/acs.jpca.6b12787, 2017.
